# Supplementary material for: QTL Analysis of Five Morpho-Physiological Traits in Bread Wheat Using Two Mapping Populations Derived from Common Parents
Source: MDPI journal article supplement (doi:10.3390/genes12040604), 2021-04-20
Supplement: s1 [file s1]

**Table S1.** Shapiro-Wilk test results. Normality test on the trait distributions among the generations using the Shapiro-Wilk test.

| Trait | F <sub>2</sub>   | F <sub>3</sub>  | F <sub>6</sub>   | F <sub>7</sub>   |
|-------|------------------|-----------------|------------------|------------------|
|       | W - p.value      | W - p.value     | W - p.value      | W - p.value      |
| HD    | 0.97 - 5.27 e-7  | 0.92 - 4.95 e-8 | 0.97 - 7.40 e-4  | 0.98 - 1.30 e-3  |
| GH    | 0.79 - 8.38 e-15 | 0.93 - 5.06 e-7 | 0.98 - 5.68 e-2  | 0.97 - 2.98 e-5  |
| PH    | 0.99 - 11.41 e-2 | 0.98 - 2.21 e-2 | 0.99 - 16.80 e-2 | 0.99 - 21.40 e-2 |
| TTN   | 0.98 - 5.00 e-2  | 0.98 - 6.78 e-2 | 0.96 - 1.80 e-4  | 0.98 - 5.75 e-2  |
| FTN   | 0.99 - 13.79 e-2 | 0.98 - 2.22 e-2 | 0.97 - 1.06 e-2  | 0.98 - 71.13 e-2 |

**Table S2** Phenotypic correlations among the five investigated traits.  $r$  = Pearson correlation coefficients. HD = heading date; PH = plant height; GH = growth habit; TTN = total tiller number; FTN = fertile tiller number.

| Pop.           | Trait | r     |       |       |       |       | p-value   |           |           |           |           |
|----------------|-------|-------|-------|-------|-------|-------|-----------|-----------|-----------|-----------|-----------|
|                |       | HD    | GH    | PH    | TTN   | FTN   | HD        | GH        | PH        | TTN       | FTN       |
| F <sub>2</sub> | HD    | 1.00  | 0.15  | -0.14 | -0.05 | -0.11 | 0         | 5.19E-02  | 0.0629363 | 5.20E-01  | 1.39E-01  |
|                | GH    | 0.15  | 1.00  | -0.12 | 0.45  | 0.45  | 0.0519015 | 0.00E+00  | 0.1083925 | 4.32E-10  | 4.66E-10  |
|                | PH    | -0.14 | -0.12 | 1.00  | -0.08 | -0.04 | 0.0629363 | 1.08E-01  | 0         | 3.06E-01  | 5.84E-01  |
|                | TTN   | -0.05 | 0.45  | -0.08 | 1.00  | 0.98  | 0.5204431 | 4.32E-10  | 0.3063691 | 0.00E+00  | 7.03E-117 |
|                | FTN   | -0.11 | 0.45  | -0.04 | 0.98  | 1.00  | 0.1387115 | 4.66E-10  | 0.5836821 | 7.03E-117 | 0.00E+00  |
| F <sub>3</sub> | HD    | 1.00  | 0.41  | -0.28 | 0.16  | 0.17  | 0.00E+00  | 2.79E-08  | 0.0002209 | 4.05E-02  | 2.82E-02  |
|                | GH    | 0.41  | 1.00  | -0.11 | 0.02  | 0.04  | 2.79E-08  | 0.00E+00  | 0.1477295 | 7.71E-01  | 6.26E-01  |
|                | PH    | -0.28 | -0.11 | 1.00  | 0.01  | 0.02  | 2.21E-04  | 1.48E-01  | 0         | 9.44E-01  | 7.44E-01  |
|                | TTN   | 0.16  | 0.02  | 0.01  | 1.00  | 0.90  | 4.05E-02  | 7.71E-01  | 0.9441459 | 0.00E+00  | 2.39E-62  |
|                | FTN   | 0.17  | 0.04  | 0.02  | 0.90  | 1.00  | 2.82E-02  | 6.26E-01  | 0.7438394 | 2.39E-62  | 0.00E+00  |
| F <sub>6</sub> | HD    | 1.00  | 0.24  | -0.27 | 0.23  | 0.20  | 0         | 0.0021329 | 0.0004956 | 3.72E-03  | 1.22E-02  |
|                | GH    | 0.24  | 1.00  | 0.04  | 0.19  | 0.21  | 0.0021329 | 0         | 0.6601272 | 1.40E-02  | 9.16E-03  |
|                | PH    | -0.27 | 0.04  | 1.00  | -0.08 | -0.06 | 0.0004956 | 0.6601272 | 0         | 3.30E-01  | 4.18E-01  |
|                | TTN   | 0.23  | 0.19  | -0.08 | 1.00  | 0.93  | 0.0037224 | 0.0139652 | 0.3297482 | 0.00E+00  | 2.44E-72  |
|                | FTN   | 0.20  | 0.21  | -0.06 | 0.93  | 1.00  | 0.0121706 | 0.0091604 | 0.4176902 | 2.44E-72  | 0.00E+00  |
| F <sub>7</sub> | HD    | 1.00  | 0.33  | -0.06 | 0.08  | 0.04  | 0.00E+00  | 7.55E-06  | 0.4109153 | 2.68E-01  | 5.64E-01  |
|                | GH    | 0.33  | 1.00  | 0.06  | 0.15  | 0.11  | 7.55E-06  | 0.00E+00  | 0.4373474 | 5.13E-02  | 1.52E-01  |
|                | PH    | -0.06 | 0.06  | 1.00  | -0.09 | -0.09 | 4.11E-01  | 4.37E-01  | 0         | 2.35E-01  | 2.57E-01  |
|                | TTN   | 0.08  | 0.15  | -0.09 | 1.00  | 0.82  | 2.68E-01  | 5.13E-02  | 0.2351835 | 0.00E+00  | 1.33E-44  |
|                | FTN   | 0.04  | 0.11  | -0.09 | 0.82  | 1.00  | 5.64E-01  | 1.52E-01  | 0.2571609 | 1.33E-44  | 0.00E+00  |

**Table S3.** Genetic map features. Main map characteristics concerning genetics maps constructed on F<sub>2</sub> and F<sub>6</sub> generations.

| Map Features               | F <sub>2</sub> | F <sub>6</sub> |
|----------------------------|----------------|----------------|
| Linkage groups             | 39             | 38             |
| Lenght (cM)                | 2,486.97       | 3,732.84       |
| Marker density (Marker/cM) | 1.37           | 1.00           |
| Chr lenght average (cM)    | 118.43         | 177.75         |
| Max chr lenght (cM)        | 231.56         | 360.26         |
| Min chr lenght (cM)        | 5.01           | 3.93           |
| Mean markers gap (cM)      | 1.15           | 1.50           |
| N° SNPs Genome A           | 1,527          | 1,777          |
| N° SNPs Genome B           | 1,569          | 1,691          |
| N° SNPs Genome D           | 316            | 278            |
| Genome A coverage (cM)     | 1,180.94       | 1,738.77       |
| Genome B coverage (cM)     | 915.75         | 1,578.35       |
| Genome D coverage (cM)     | 390.28         | 415.71         |
| Genome A marker density*   | 1.29           | 1.02           |
| Genome B marker density*   | 1.71           | 1.07           |
| Genome D marker density*   | 0.81           | 0.67           |

\*Marker/cM

**Table S4** Genetic map data summary. Distribution of SNP markers across the twenty-one chromosome in the F<sub>2</sub> and F<sub>6</sub> genetic maps. Chromosome's length (cM), distance (cM), number of markers in common between F<sub>2</sub> and F<sub>6</sub>, and coefficient of collinearity (Rho) were reported.

| Cromosome | Chromosome lenght (cM) |                | Distance (cM) <sup>a</sup> |                | #Markers F <sub>2</sub> /F <sub>6</sub> <sup>b</sup> | Rho   |
|-----------|------------------------|----------------|----------------------------|----------------|------------------------------------------------------|-------|
|           | F <sub>2</sub>         | F <sub>6</sub> | F <sub>2</sub>             | F <sub>6</sub> |                                                      |       |
| 1A        | 180.64                 | 204.33         | 1.01                       | 0.90           | 138                                                  | 0.95  |
| 1B        | 231.56                 | 289.12         | 0.6                        | 0.81           | 190                                                  | 0.81  |
| 1D        | 128.78                 | 106.05         | 1.09                       | 1.12           | 63                                                   | 0.72  |
| 2A        | 145.86                 | 186.23         | 0.6                        | 0.55           | 224                                                  | 0.91  |
| 2B        | 144.91                 | 163.62         | 0.49                       | 1.41           | 53                                                   | 0.86  |
| 2D        | 100.55                 | 82.24          | 2.23                       | 3.16           | 10                                                   | -0.21 |
| 3A        | 178.51                 | 232.65         | 0.74                       | 1.62           | 103                                                  | 0.92  |
| 3B        | 47.19                  | 328.49         | 1.47                       | 0.84           | 32                                                   | 0.73  |
| 3D        | 5.01                   | 9.35           | 0.26                       | 2.34           | 0                                                    | /     |
| 4A        | 163.72                 | 162            | 1.67                       | 1.13           | 74                                                   | 0.75  |
| 4B        | 133.62                 | 155.29         | 0.81                       | 1.51           | 58                                                   | 0.86  |
| 4D        | 38.59                  | 3.93           | 2.41                       | 0.98           | 5                                                    | -0.89 |
| 5A        | 189.70                 | 342.88         | 0.7                        | 1.13           | 194                                                  | 0.84  |
| 5B        | 203.32                 | 360.26         | 0.55                       | 0.93           | 234                                                  | 0.91  |
| 5D        | 27.15                  | 17.08          | 0.94                       | 0.61           | 19                                                   | 0.09  |
| 6A        | 128.13                 | 302.43         | 0.46                       | 1.04           | 182                                                  | 0.82  |
| 6B        | 112.25                 | 210.82         | 0.44                       | 0.82           | 179                                                  | 0.94  |
| 6D        | 35.16                  | 69.67          | 0.49                       | 0.71           | 67                                                   | 0.83  |
| 7A        | 194.26                 | 308.24         | 0.93                       | 0.95           | 165                                                  | 0.91  |
| 7B        | 42.90                  | 70.75          | 0.75                       | 0.96           | 51                                                   | 0.84  |
| 7D        | 55.05                  | 127.39         | 5.51                       | 7.96           | 2                                                    | -1    |

<sup>a</sup> Distance between adjacent markers

<sup>b</sup> Number of markers in common between the two populations F<sub>2</sub> and F<sub>7</sub>

<sup>c</sup> Spearman's rho statistic is used to estimate a rank-based measure of association.

HD

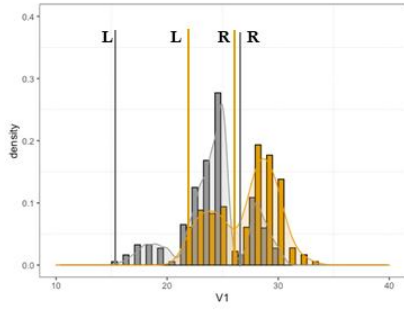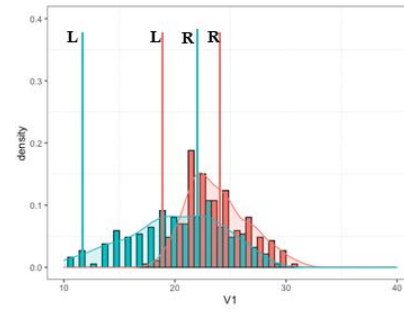

PH

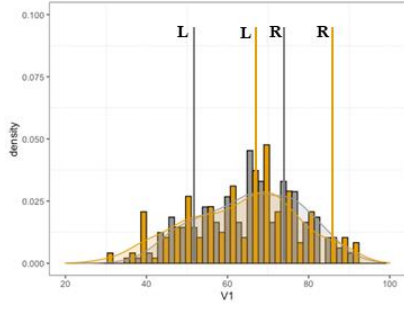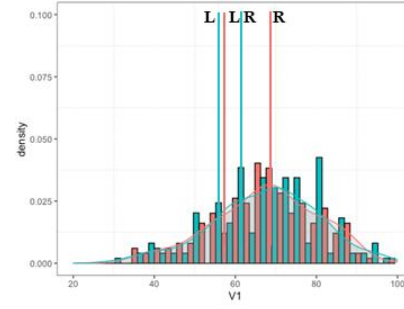

GH

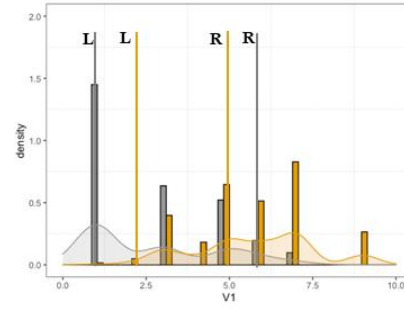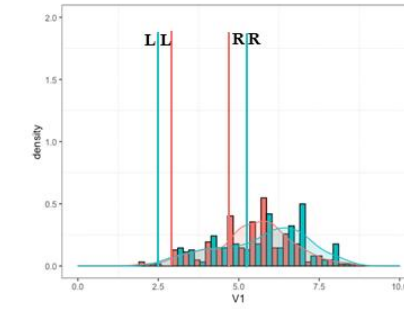

TTN

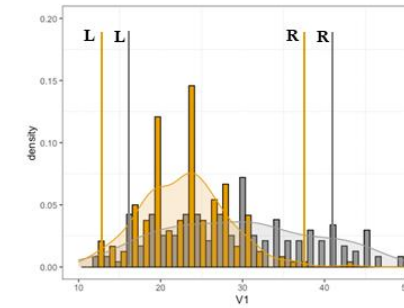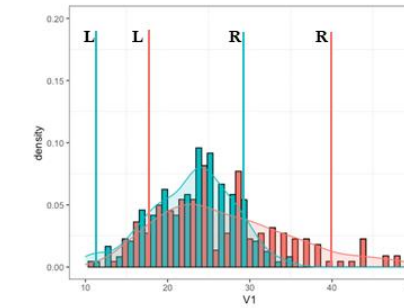

FTN

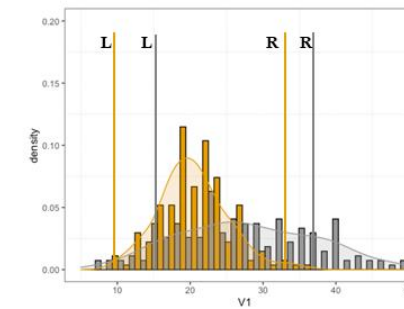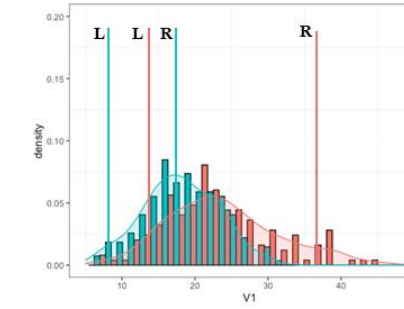

**Figure S1** Phenotypic distribution for the five traits across the F<sub>2</sub> (grey bars), F<sub>3</sub> (orange bars), F<sub>6</sub> (red bars) and F<sub>7</sub> (green bars). The x-axis represents phenotypic values, whereas the y-axis corresponds to density. Phenotypic values of parental lines Lankaodali (L) and Rebelde (R) are also shown. HD = heading date; PH = plant height; GH = growth habit; TTN = total tiller number; FTN = fertile tiller number.

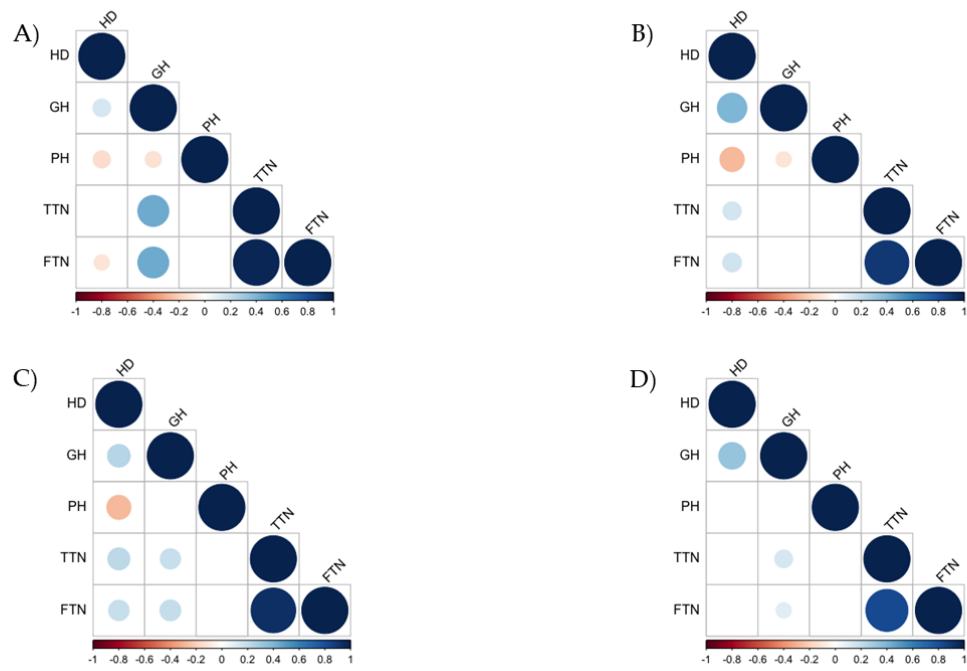

**Figure S2** Pearson's correlation matrix for the five traits measured across the F<sub>2</sub> (A), F<sub>3</sub> (B), F<sub>6</sub> (C) and F<sub>7</sub> (D) populations. The square blank refers to the Pearson's correlation test yielded a non-significant p-value ( $p > 0.05$ ). HD = heading date; PH = plant height; GH = growth habit; TTN = total tiller number; FTN = fertile tiller number.

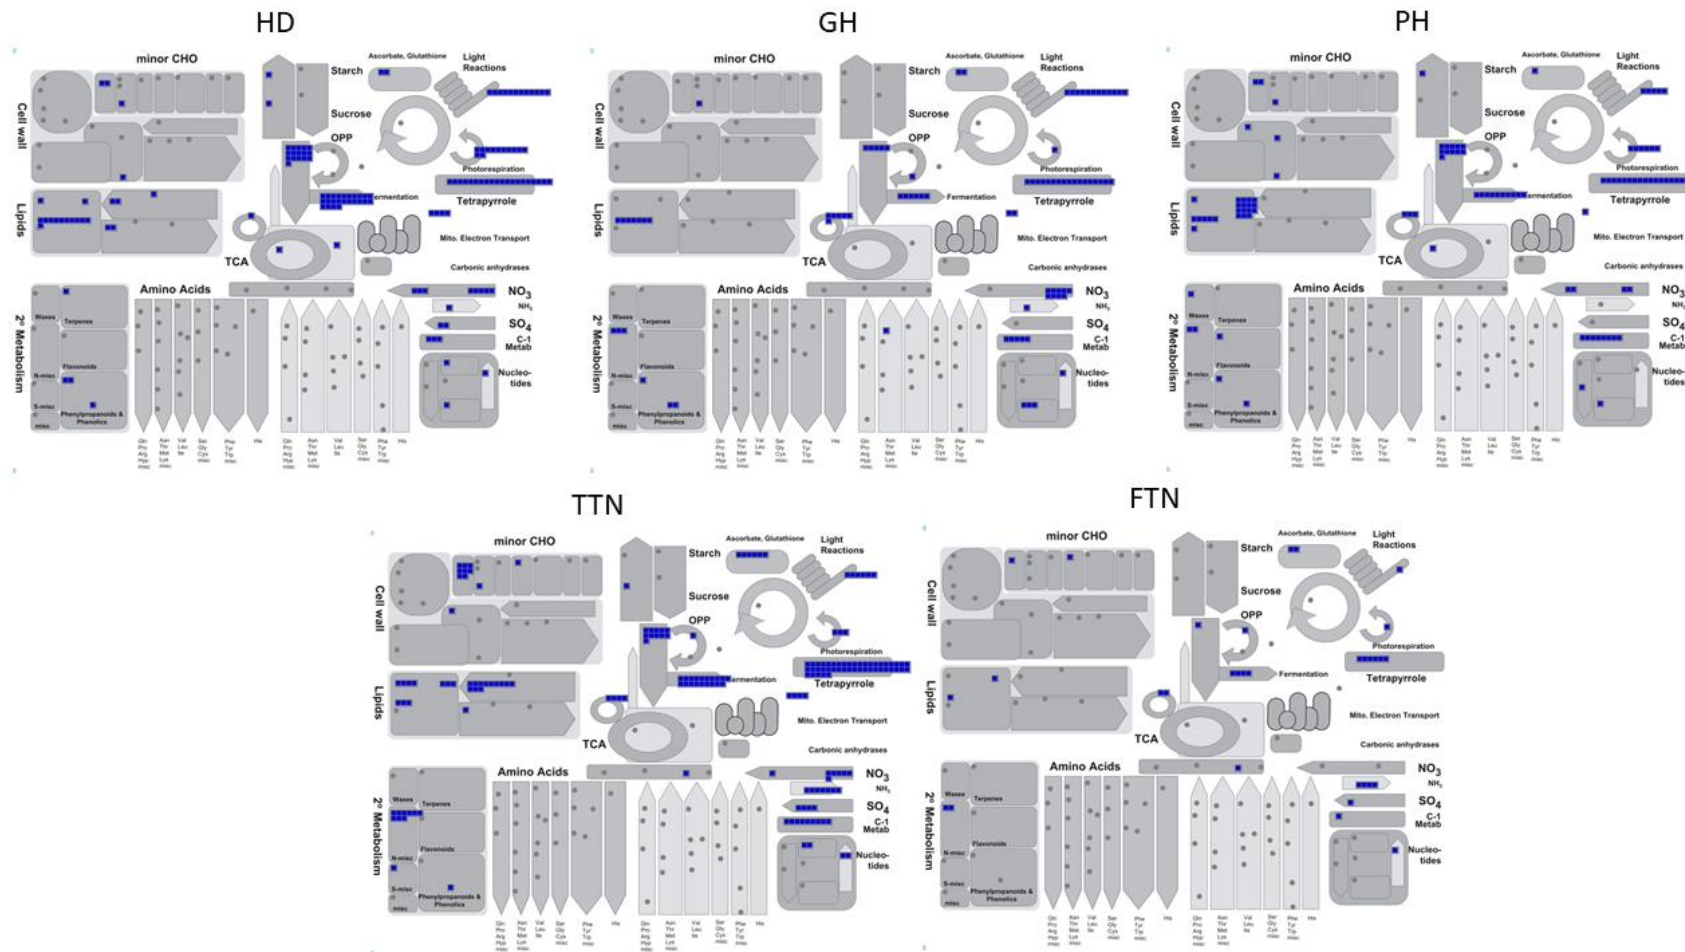

**Figure S3** MapMan analysis. The blue squares indicated the major pathways of metabolic processes in which candidate genes were involved. HD = heading date; PH = plant height; GH = growth habit; TTN = total tiller number; FTN = fertile tiller number.
